# Supplementary material for: Thinned young apple polyphenols may prevent neuronal apoptosis by up-regulating 5-hydroxymethylcytosine in the cerebral cortex of high-fat diet-induced diabetic mice
Source: Royal Society of Chemistry journal article supplement (doi:10.1039/d2fo03281c), 2023-01-01

Raw images of Figure 2C:

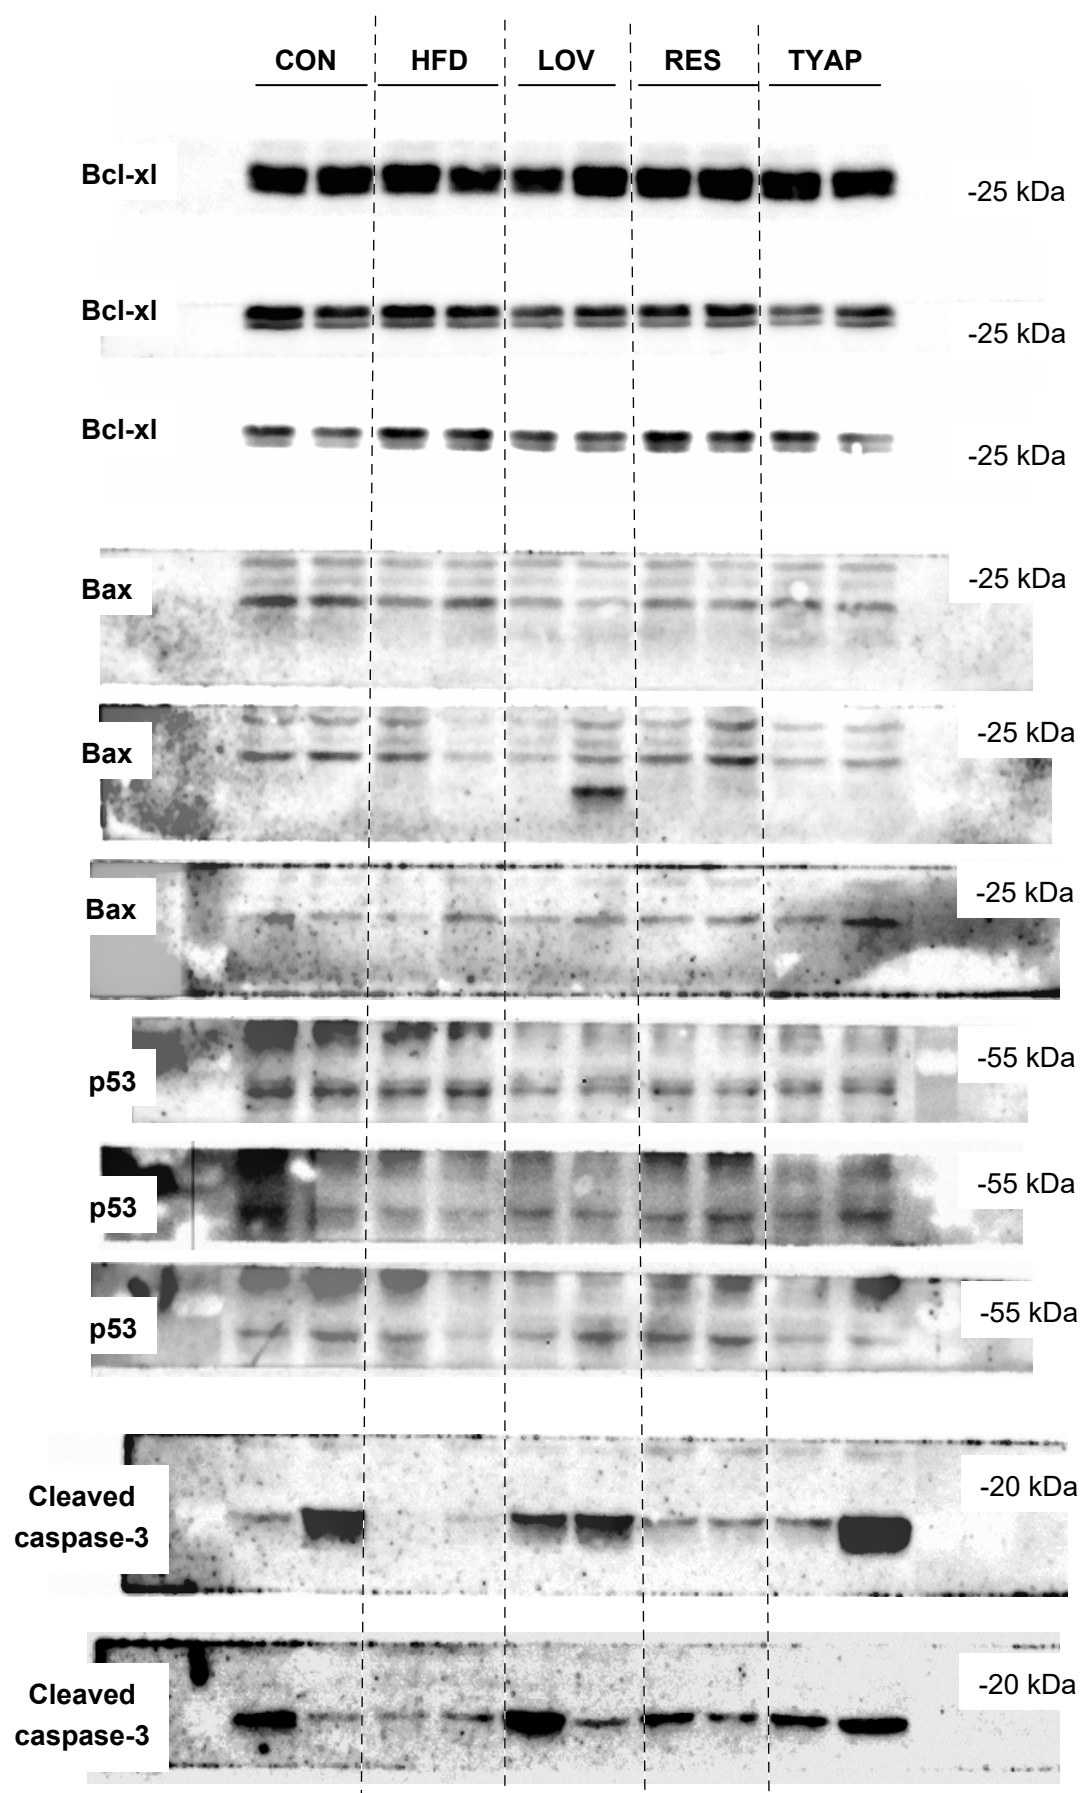

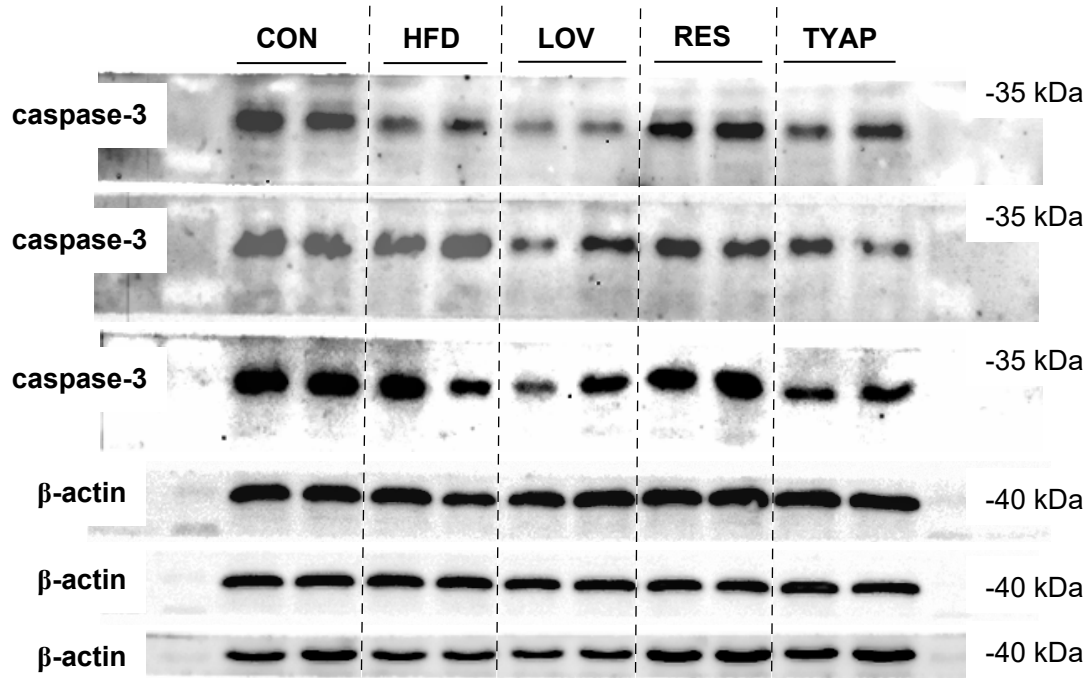

Raw images of Figure 3G:

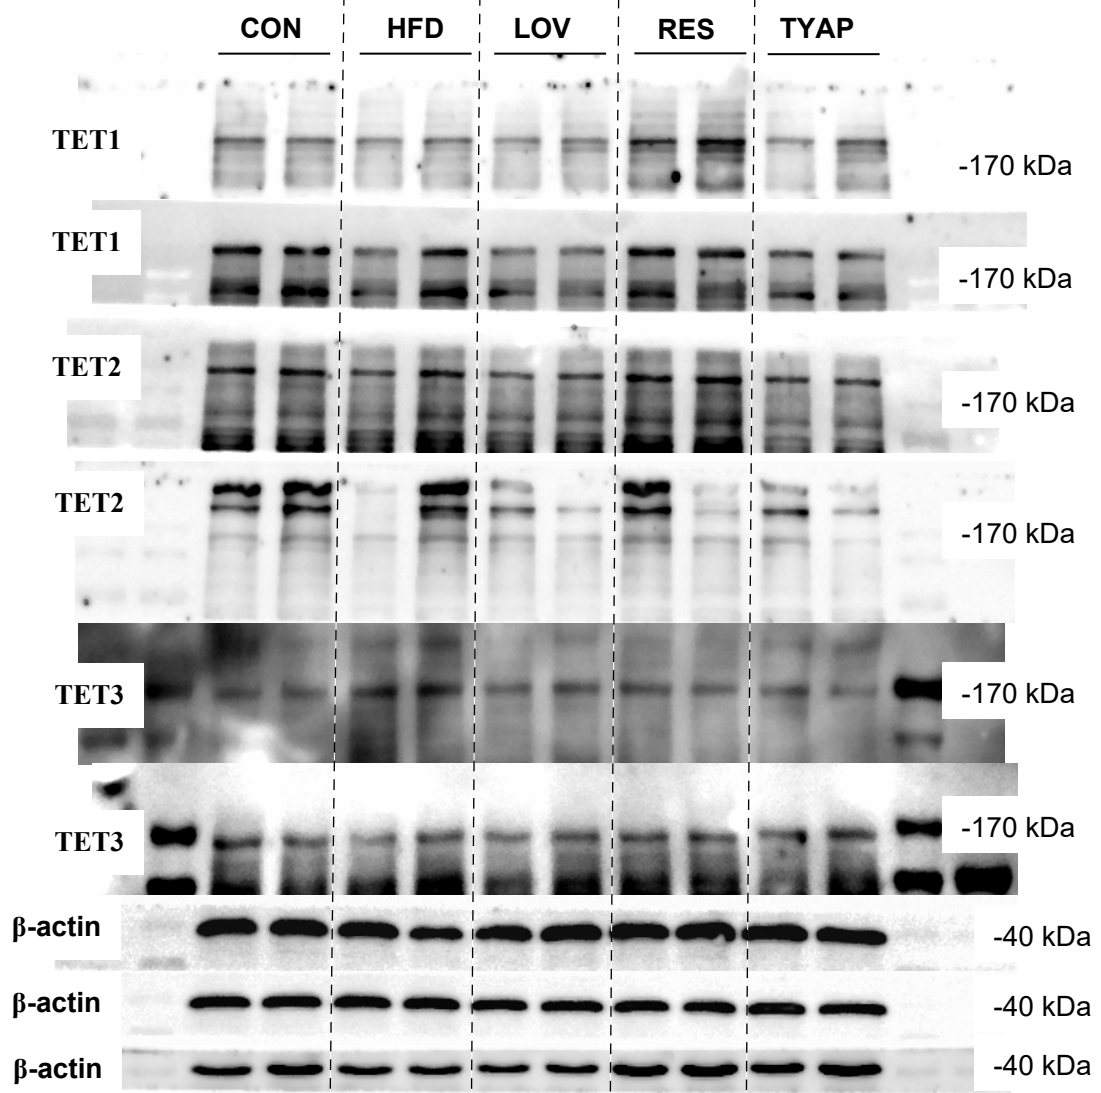

Raw images of Figure 4A:

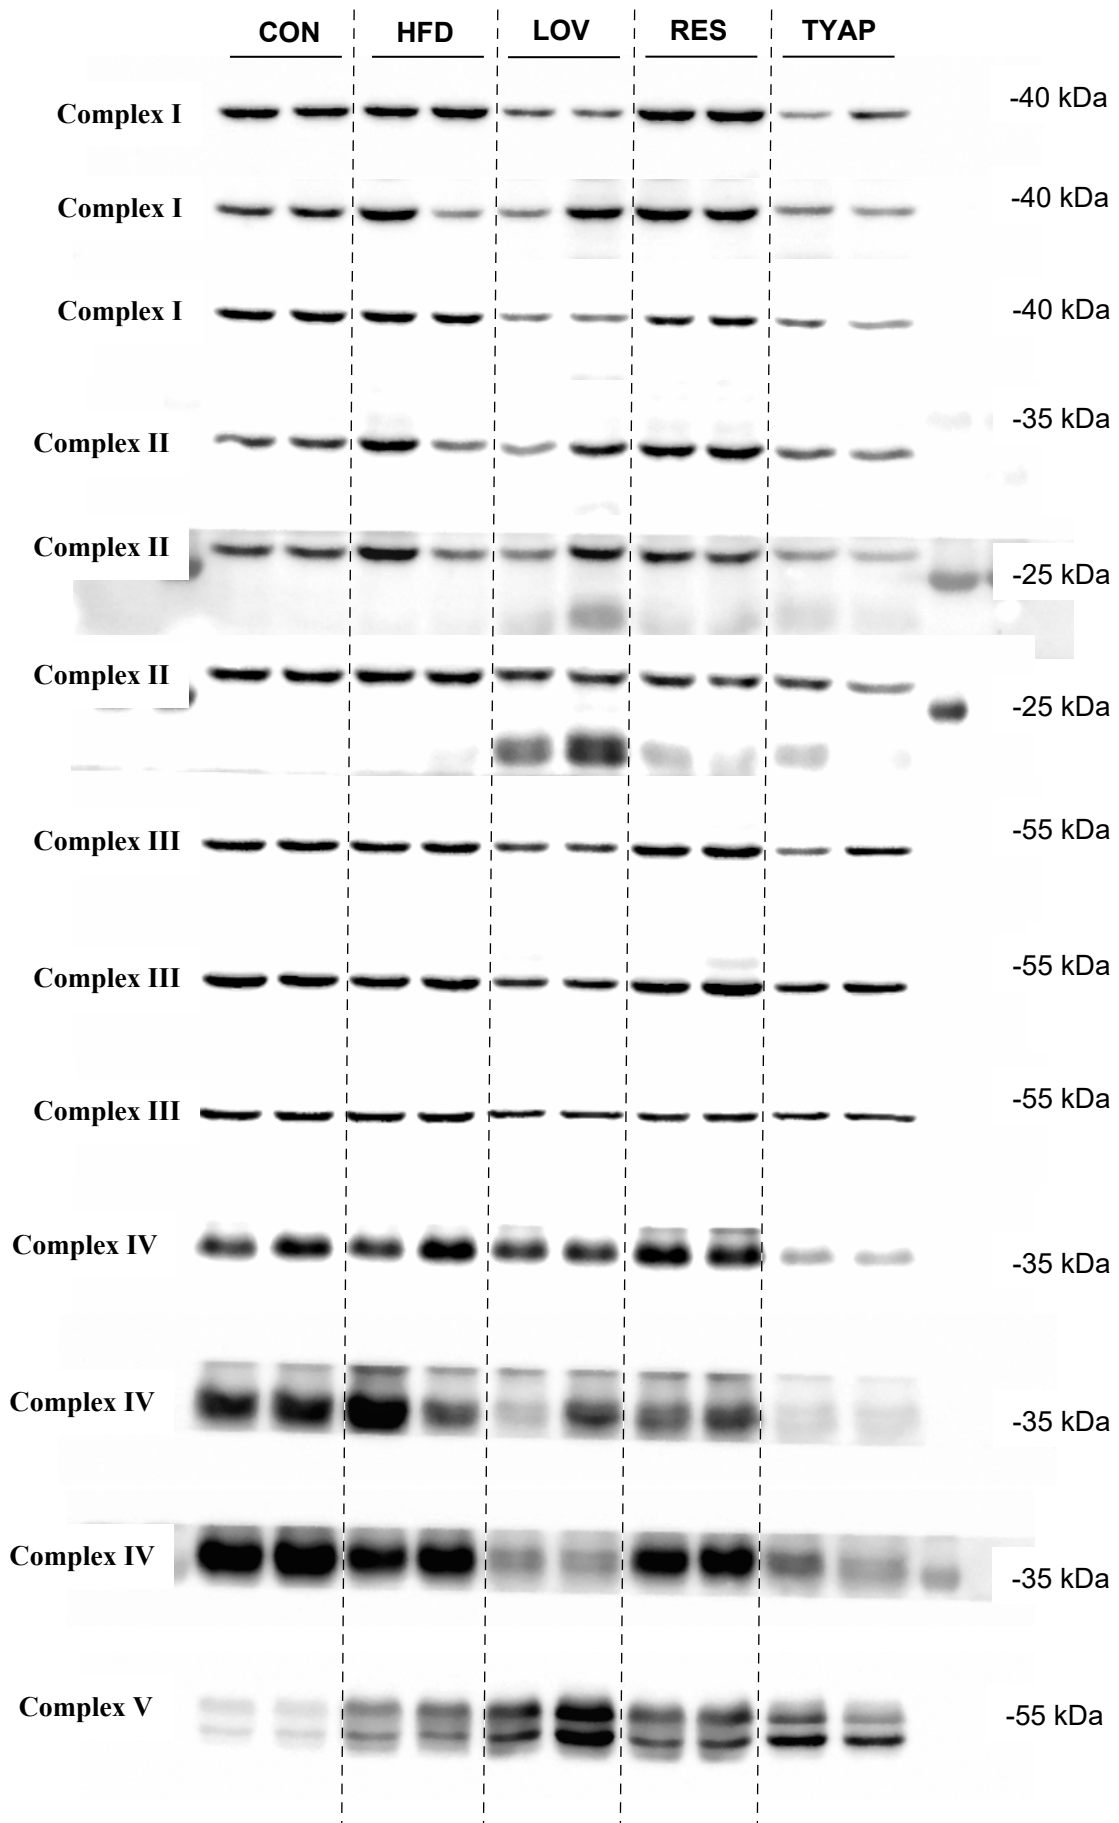

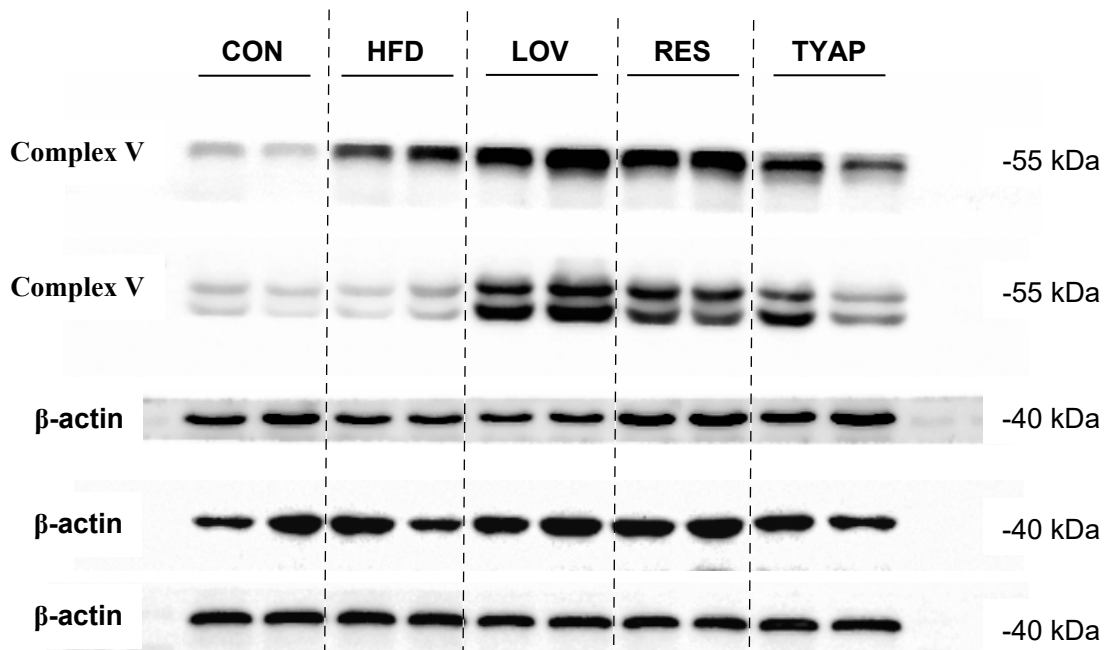

Raw images of Figure 4B:

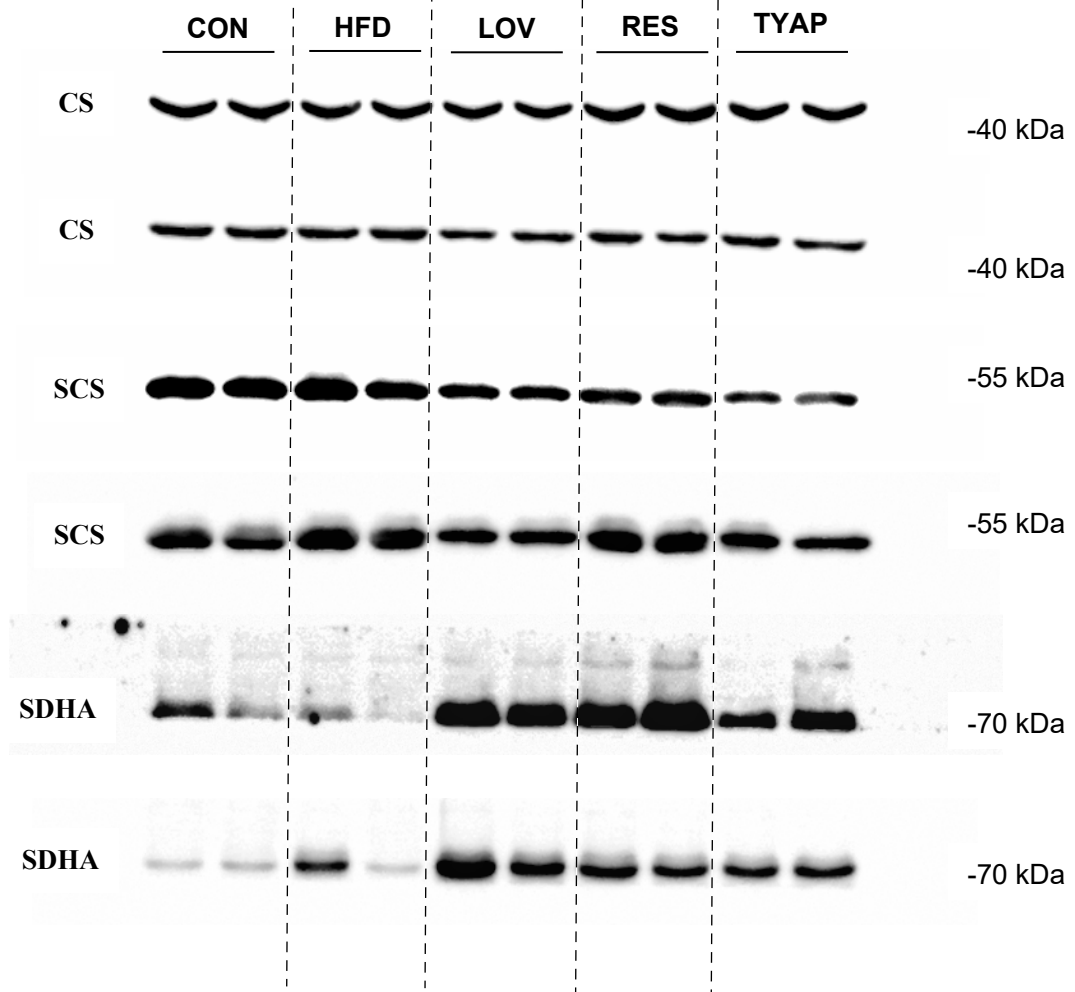

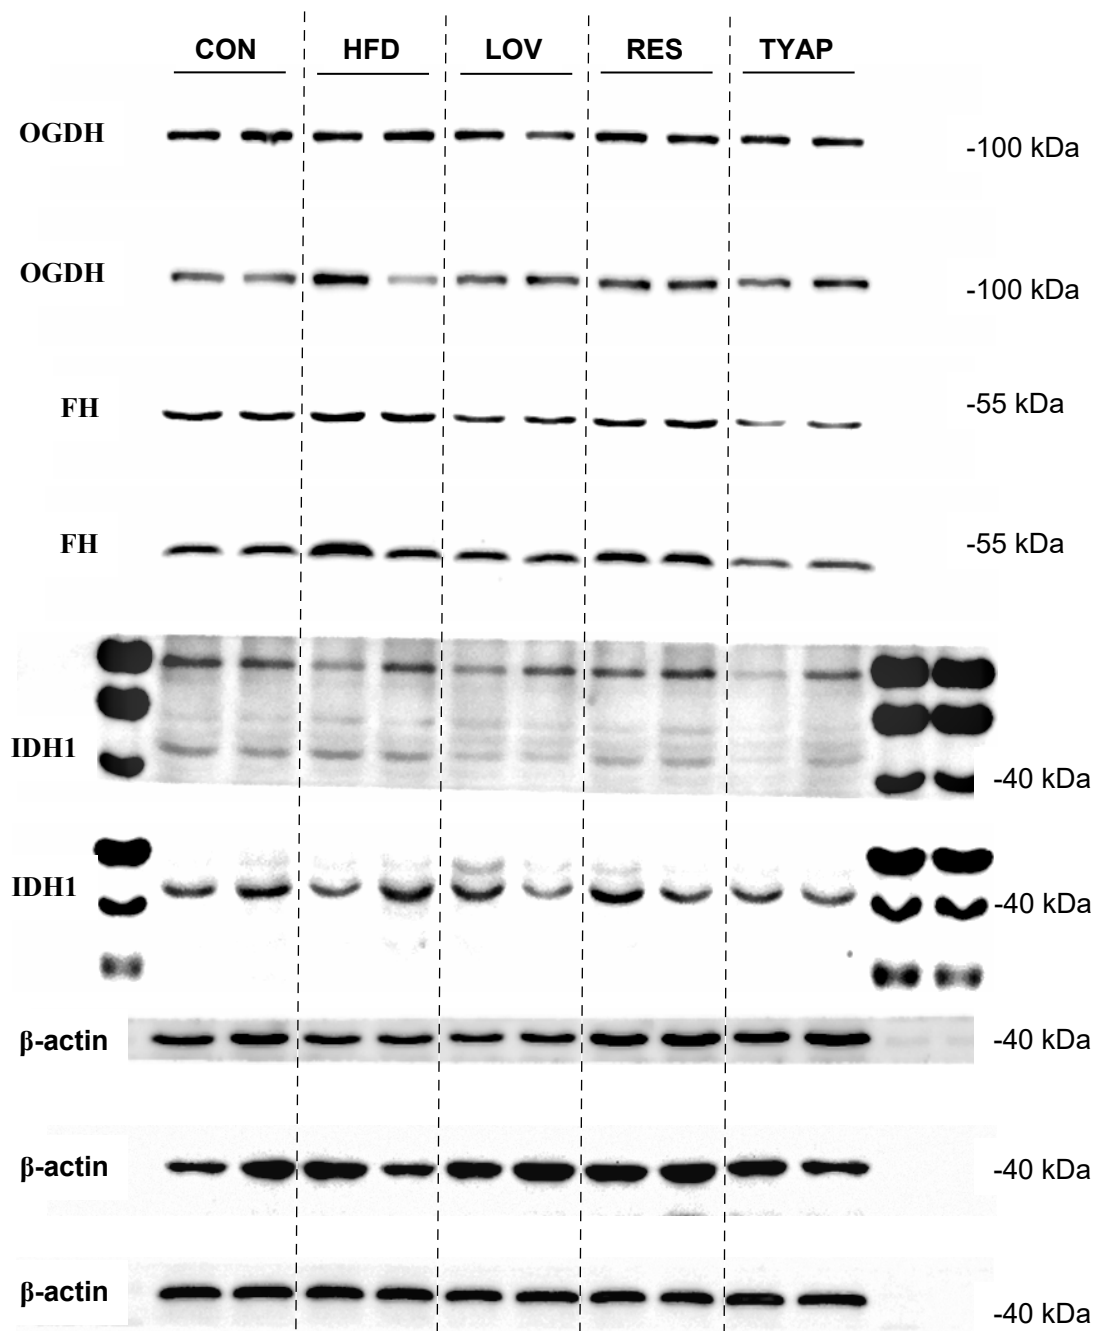

Raw images of Figure S2A:

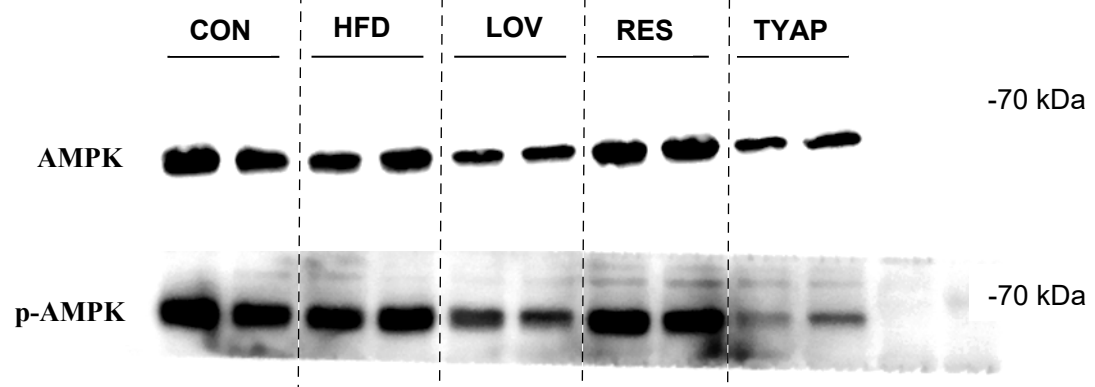

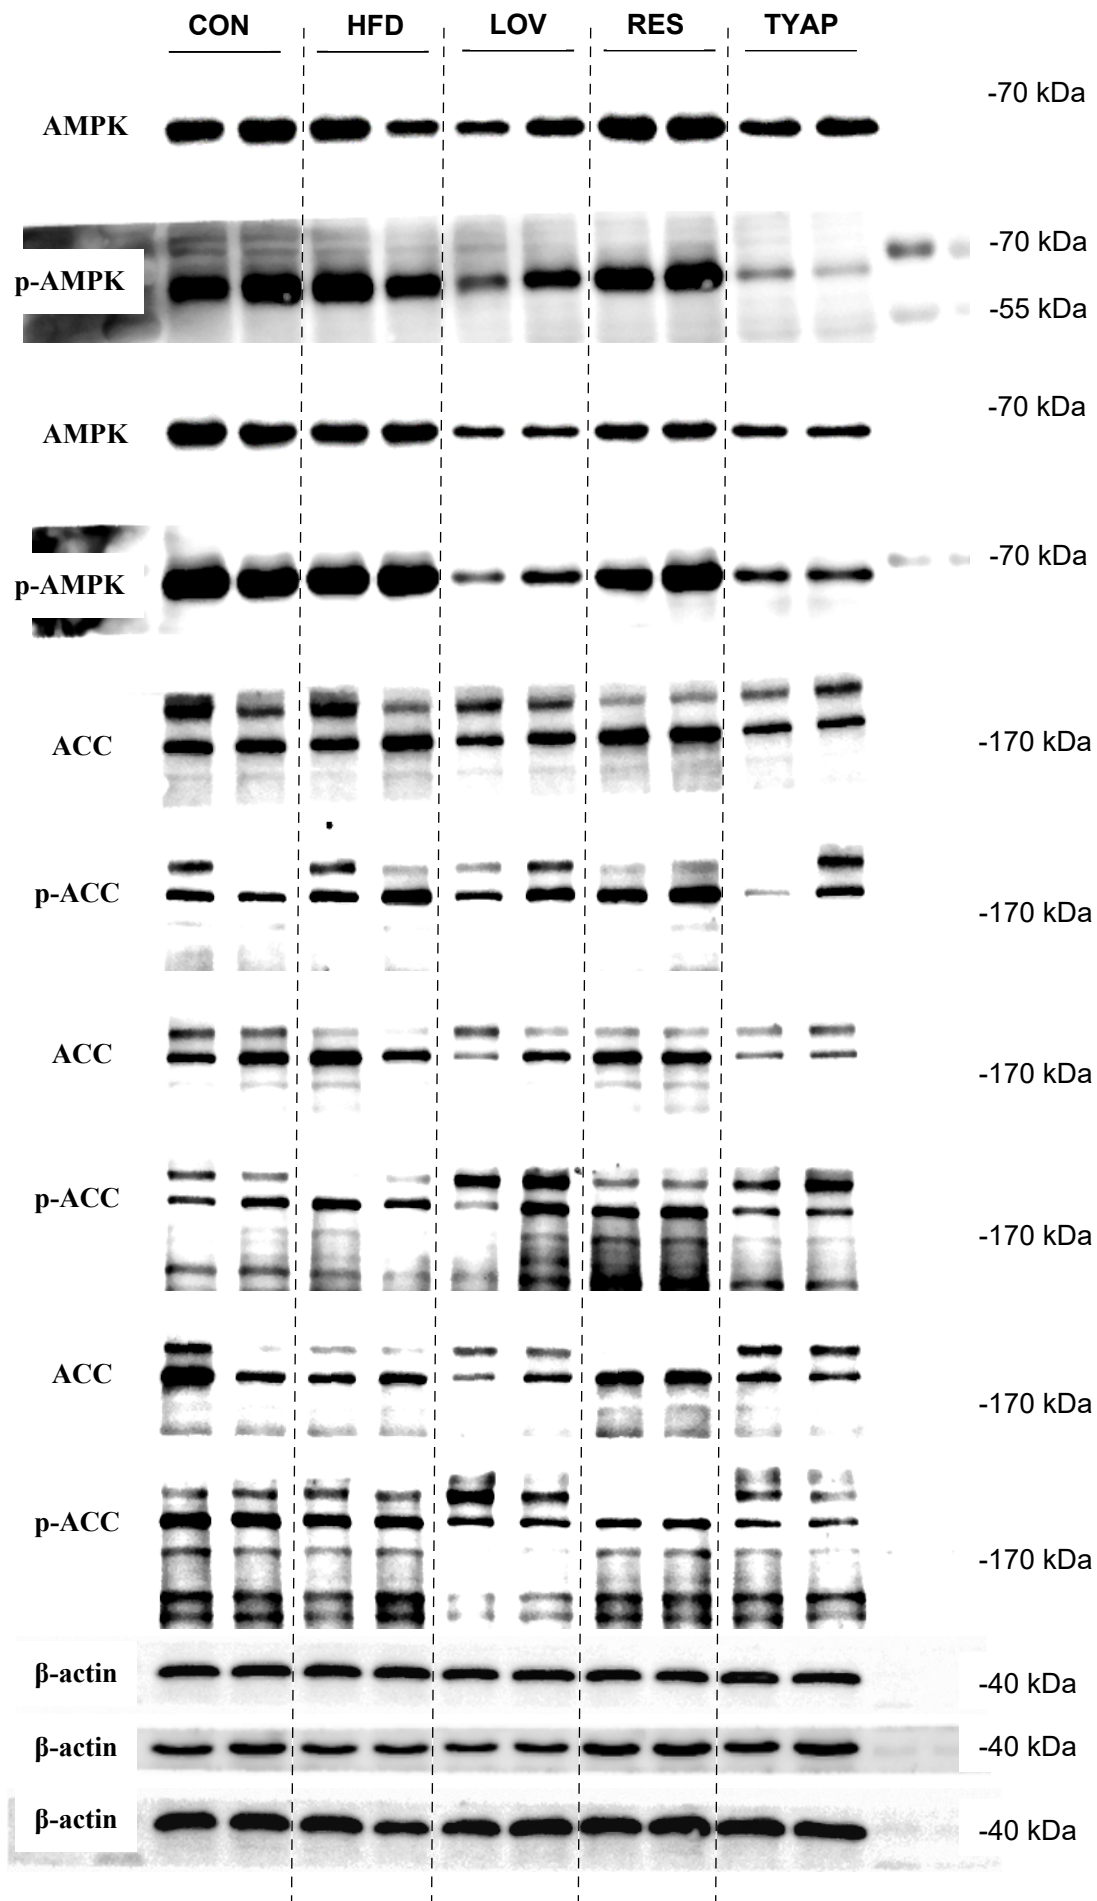

Supplement: d2fo03281c1.pdf [file d2fo03281c1.pdf]
