# Supplementary material for: Thinned young apple polyphenols may prevent neuronal apoptosis by up-regulating 5-hydroxymethylcytosine in the cerebral cortex of high-fat diet-induced diabetic mice
Source: Royal Society of Chemistry journal article supplement (doi:10.1039/d2fo03281c), 2023-01-01
Supplement: d2fo03281c2.pdf [file d2fo03281c2.pdf]

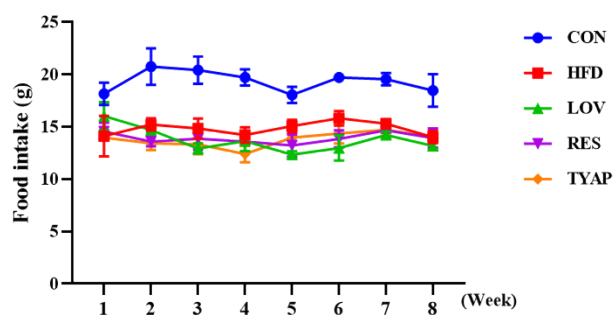

**Figure S1.** Effects of TYAP on food intake of HFD-induced diabetic mice. The values were present as the mean  $\pm$  SD (n = 12).

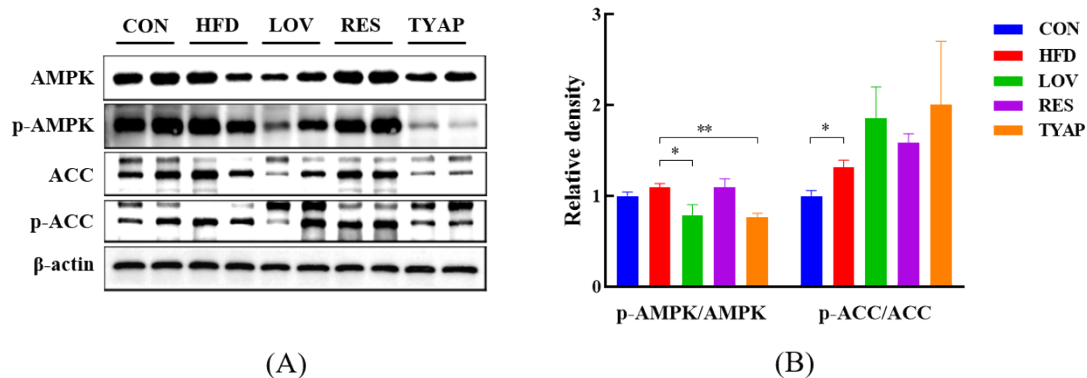

**Figure S2.** Effects of TYAP on the activation of AMPK/ACC signaling pathway. (A) Western blotting images; (B) Statistical analysis of the protein expression of p-AMPK/AMPK and p-ACC/ACC. The values were present as the mean  $\pm$  SD (n = 6), \* $p$  < 0.05, and \*\* $p$  < 0.01 versus the HFD group.
